# Supplementary material for: U.S. State Preemption Laws and Working-Age Mortality
Source: PubMed Central journal article supplement — Am J Prev Med. Author manuscript; Available in PMC 2023 May 7. (PMC10164355; doi:10.1016/j.amepre.2022.06.005), 2022-08-29
Supplement: NIHMS1892707-supplement-Online_Supplement.pdf [file NIHMS1892707-supplement-Online_Supplement.pdf]

**Appendix**  
**U.S. State Preemption Laws and Working-Age Mortality**  
**Wolf et al.**

**Appendix Table 1.** Negative Binomial Regression Coefficients for Cause-of-Death Analyses, Women, 1999–2019

| Explanatory variables      | Cause of death       |                      |                     |                      |                     |
|----------------------------|----------------------|----------------------|---------------------|----------------------|---------------------|
|                            | Suicide              | Homicide             | Drug overdose       | Alcohol              | Transport accidents |
| Minimum wage (\$)          | −0.00377<br>(0.49)   | −0.0121<br>(0.83)    | 0.000613<br>(0.03)  | −0.0264<br>(0.77)    | −0.0163<br>(0.71)   |
| PSL hours                  | −0.000433<br>(0.72)  | −0.00235**<br>(3.03) | −0.00231<br>(1.19)  | −0.00412**<br>(2.77) | 0.000804<br>(1.08)  |
| Proportion Black           | −0.919***<br>(11.23) | 1.559***<br>(8.85)   | −1.119***<br>(5.73) | −0.373<br>(1.43)     | −0.265**<br>(2.70)  |
| Proportion Hispanic        | −1.269***<br>(9.33)  | −0.0825<br>(0.47)    | −1.482***<br>(5.61) | −0.876***<br>(4.52)  | −0.62***<br>(3.93)  |
| Proportion Other races     | −0.577<br>(1.96)     | −0.303<br>(0.70)     | −1.743***<br>(6.67) | 2.158***<br>(3.54)   | −0.445<br>(0.69)    |
| Proportion 35–44 years old | −2.62***<br>(3.83)   | −2.864***<br>(4.30)  | −7.605***<br>(8.42) | −10.24***<br>(6.66)  | 0.371<br>(0.46)     |
| Proportion 45–54 years old | −0.809<br>(1.70)     | −2.207**<br>(2.70)   | −1.282<br>(1.90)    | 0.958<br>(0.92)      | 0.0638<br>(0.14)    |
| Proportion 55–64 years old | 0.909*<br>(2.35)     | 0.743<br>(1.02)      | −1.402**<br>(2.99)  | −1.49<br>(1.46)      | 1.574**<br>(3.19)   |
| Unemployment rate          | 0.538<br>(1.42)      | 1.542*<br>(2.24)     | 3.345***<br>(5.92)  | 4.937***<br>(5.03)   | 1.148**<br>(2.86)   |
| Employment rate            | −0.494***<br>(3.89)  | −1.388***<br>(7.71)  | −1.224***<br>(5.23) | −0.0117<br>(0.03)    | −1.442***<br>(6.79) |
| ACA Medicaid expansion     | 0.0416<br>(1.62)     | 0.0135<br>(0.40)     | 0.166**<br>(2.74)   | 0.058<br>(0.73)      | 0.00615<br>(0.22)   |
| Sample size                | 263,172              | 263,172              | 263,172             | 150,384              | 263,172             |

*Note:* *t* statistics in parentheses; *p*-values indicated by \* (0.05), \*\* (0.01), and \*\*\* (0.001). Alcohol data covers years 2008 through 2019. Models also include fixed effects for location (state-by-urbanicity code), year, and quarter; SEs are clustered at the state level.

**Appendix**  
**U.S. State Preemption Laws and Working-Age Mortality**  
**Wolf et al.**

**Appendix Table 2.** Negative Binomial Regression Coefficients for Cause-of-Death Analyses, Men, 1999–2019

| Explanatory variables      | Cause of death       |                     |                     |                     |                     |
|----------------------------|----------------------|---------------------|---------------------|---------------------|---------------------|
|                            | Suicide              | Homicide            | Drug overdose       | Alcohol             | Transport accidents |
| Minimum wage (\$)          | −0.00216<br>(0.36)   | −0.017<br>(0.92)    | 0.00902<br>(0.46)   | −0.0421<br>(1.42)   | −0.0112<br>(0.92)   |
| PSL hours                  | −0.000898*<br>(2.41) | −0.00207*<br>(2.03) | −0.00127<br>(0.70)  | −0.000529<br>(0.36) | 0.000269<br>(0.37)  |
| Proportion Black           | −0.77***<br>(9.55)   | 3.166***<br>(13.03) | −0.861***<br>(3.88) | −0.0484<br>(0.21)   | 0.131<br>(1.11)     |
| Proportion Hispanic        | −0.953***<br>(10.44) | 0.716***<br>(3.57)  | −0.578*<br>(2.04)   | −0.118<br>(0.54)    | −0.107<br>(0.68)    |
| Proportion Other races     | −0.867*<br>(2.49)    | 1.031*<br>(1.99)    | −0.812**<br>(2.84)  | 3.002***<br>(4.93)  | 0.0204<br>(0.04)    |
| Proportion 35–44 years old | −1.309***<br>(4.67)  | −4.389***<br>(4.81) | −5.846***<br>(6.10) | −5.345***<br>(5.21) | −0.107<br>(0.16)    |
| Proportion 45–54 years old | −0.18<br>(0.66)      | −3.565***<br>(6.57) | −1.344*<br>(2.18)   | −3.379***<br>(3.31) | 0.841*<br>(2.52)    |
| Proportion 55–64 years old | 1.542***<br>(7.15)   | 2.658***<br>(4.28)  | 0.811<br>(1.73)     | 1.857**<br>(2.77)   | 2.934***<br>(8.40)  |
| Unemployment rate          | 1.26**<br>(3.03)     | 3.274***<br>(4.44)  | 3.471***<br>(4.74)  | 5.397***<br>(7.31)  | 1.098**<br>(2.90)   |
| Employment rate            | −0.595***<br>(4.53)  | −0.743**<br>(2.68)  | −0.851**<br>(3.15)  | 0.0472<br>(0.17)    | −0.958***<br>(4.31) |
| ACA Medicaid expansion     | −0.0104<br>(0.59)    | −0.00535<br>(0.15)  | 0.17*<br>(2.47)     | 0.0529<br>(1.15)    | −0.0148<br>(0.61)   |
| Sample size                | 263,172              | 263,172             | 263,172             | 150,384             | 263,172             |

*Note:* *t* statistics in parentheses; *p*-values indicated by \* (0.05), \*\* (0.01), and \*\*\* (0.001). Alcohol data covers years 2008 through 2019. Models also include fixed effects for location (state-by-urbanicity code), year, and quarter; SEs are clustered at the state level.

**Appendix**  
**U.S. State Preemption Laws and Working-Age Mortality**  
**Wolf et al.**

**Appendix Table 3.** Counties That Achieved, or Attempted to Achieve, Minimum Wage or Paid Sick Leave Requirements Above State Levels

|    | State | County          | Locality <sup>a</sup>   | RUCC category       | FIPS code | MW ever GT state | PSL ever GT state | Ever preempted | Preempted MW | Preempted PSL hours |
|----|-------|-----------------|-------------------------|---------------------|-----------|------------------|-------------------|----------------|--------------|---------------------|
| 1  | AL    | Jefferson       | Birmingham              | Large central metro | 1073      | 0                | 0                 | 1              | \$10.10      |                     |
| 2  | AZ    | Coconino        | Flagstaff               | Small metro         | 4005      | 1                | 0                 | 0              |              |                     |
| 3  | CA    | Alameda         | Berkeley <sup>b</sup>   | Large central metro | 6001      | 1                | 1                 | 0              |              |                     |
| 4  | CA    | Contra Costa    | El Cerrito <sup>c</sup> | Large fringe metro  | 6013      | 1                | 0                 | 0              |              |                     |
| 5  | CA    | Los Angeles     |                         | Large central metro | 6037      | 1                | 1                 | 0              |              |                     |
| 6  | CA    | San Diego       | San Diego               | Large central metro | 6073      | 1                | 1                 | 0              |              |                     |
| 7  | CA    | San Francisco   |                         | Large central metro | 6075      | 1                | 1                 | 0              |              |                     |
| 8  | CA    | San Mateo       | Belmont <sup>d</sup>    | Large fringe metro  | 6081      | 1                | 0                 | 0              |              |                     |
| 9  | CA    | Santa Clara     | Cupertino <sup>e</sup>  | Large central metro | 6085      | 1                | 0                 | 0              |              |                     |
| 10 | FL    | Miami-Dade      |                         | Large central metro | 12086     | 0                | 0                 | 1              | \$10.31      |                     |
| 11 | FL    | Orange          |                         | Large central metro | 12095     | 0                | 0                 | 1              |              | 56                  |
| 12 | IA    | Johnson         |                         | Small metro         | 19103     | 1                | 0                 | 1              | \$10.10      |                     |
| 13 | IA    | Lee             |                         | Micropolitan        | 19111     | 0                | 0                 | 1              | \$8.25       |                     |
| 14 | IA    | Linn            |                         | Medium metro        | 19113     | 1                | 0                 | 1              | \$10.25      |                     |
| 15 | IA    | Polk            |                         | Medium metro        | 19153     | 0                | 0                 | 1              | \$10.75      |                     |
| 16 | IA    | Wapello         |                         | Micropolitan        | 19179     | 1                | 0                 | 1              | \$10.00      |                     |
| 17 | IL    | Cook            |                         | Large central metro | 17031     | 1                | 1                 | 0              |              |                     |
| 18 | KY    | Fayette         | Lexington               | Medium metro        | 21067     | 1                | 0                 | 1              | \$10.10      |                     |
| 19 | KY    | Jefferson       | Louisville              | Large central metro | 21111     | 1                | 0                 | 1              | \$10.10      |                     |
| 20 | MD    | Montgomery      |                         | Large fringe metro  | 24031     | 1                | 1                 | 0              |              |                     |
| 21 | MD    | Prince George's |                         | Large fringe metro  | 24033     | 1                | 0                 | 0              |              |                     |
| 22 | ME    | Cumberland      | Portland                | Medium metro        | 23005     | 1                | 0                 | 0              |              |                     |
| 23 | MN    | Hennepin        | Minneapolis             | Large central metro | 27053     | 1                | 1                 | 0              |              |                     |
| 24 | MN    | Ramsey          | St. Paul                | Large central metro | 27123     | 0                | 1                 | 0              |              |                     |
| 25 | MO    | Jackson         | Kansas City             | Large central metro | 29095     | 0                | 0                 | 1              | \$15.00      |                     |
| 26 | MO    | St. Louis       |                         | Large fringe metro  | 29189     | 0                | 0                 | 1              | \$11.00      |                     |
| 27 | NJ    | Essex           | Bloomfield <sup>f</sup> | Large central metro | 34013     | 0                | 1                 | 0              |              |                     |
| 28 | NJ    | Hudson          | Jersey City             | Large central metro | 34017     | 0                | 1                 | 0              |              |                     |
| 29 | NJ    | Mercer          | Trenton                 | Medium metro        | 34021     | 0                | 1                 | 0              |              |                     |
| 30 | NJ    | Middlesex       | New Brunswick           | Large fringe metro  | 34023     | 0                | 1                 | 0              |              |                     |
| 31 | NJ    | Morris          | Morristown              | Large fringe metro  | 34027     | 0                | 1                 | 0              |              |                     |
| 32 | NJ    | Passaic         | Passaic <sup>g</sup>    | Large fringe metro  | 34031     | 0                | 1                 | 0              |              |                     |
| 33 | NJ    | Union           | Elizabeth <sup>h</sup>  | Large central metro | 34039     | 0                | 1                 | 0              |              |                     |
| 34 | NM    | Bernalillo      | Albuquerque             | Medium metro        | 35001     | 1                | 0                 | 0              |              |                     |

**Appendix**  
**U.S. State Preemption Laws and Working-Age Mortality**  
**Wolf et al.**

|    |    |              |                                 |                     |       |   |   |   |         |    |
|----|----|--------------|---------------------------------|---------------------|-------|---|---|---|---------|----|
| 35 | NM | Dona Ana     | Las Cruces                      | Small metro         | 35013 | 1 | 0 | 0 |         |    |
| 36 | NM | Santa Fe     | Santa Fe                        | Small metro         | 35049 | 1 | 0 | 0 |         |    |
| 37 | OH | Cuyahoga     | Cleveland                       | Large central metro | 39035 | 0 | 0 | 1 | \$15.00 |    |
| 38 | OK | Oklahoma     | Oklahoma City                   | Large central metro | 40109 | 0 | 0 | 1 | \$10.10 |    |
| 39 | PA | Philadelphia |                                 | Large central metro | 42101 | 0 | 1 | 0 |         |    |
| 40 | TX | Bexar        | San Antonio                     | Large central metro | 48029 | 0 | 0 | 1 |         | 64 |
| 41 | TX | Dallas       | Dallas                          | Large central metro | 48113 | 0 | 1 | 1 |         | 64 |
| 42 | TX | Travis       | Austin                          | Large central metro | 48453 | 0 | 0 | 1 |         | 64 |
| 43 | WA | King         | Seattle <sup>i</sup>            | Large central metro | 53033 | 1 | 1 | 0 |         |    |
| 44 | WA | Pierce       | Tacoma                          | Large fringe metro  | 53053 | 1 | 1 | 0 |         |    |
| 45 | WA | Spokane      | Spokane                         | Medium metro        | 53063 | 0 | 1 | 0 |         |    |
| 46 | WI | Calumet      | (part of) Appleton <sup>j</sup> | Small metro         | 55015 | 0 | 0 | 1 | \$10.10 |    |
| 47 | WI | Dane         |                                 | Medium metro        | 55025 | 0 | 0 | 1 | \$10.10 |    |
| 48 | WI | Eau Claire   |                                 | Small metro         | 55035 | 0 | 0 | 1 | \$10.10 |    |
| 49 | WI | Kenosha      |                                 | Large fringe metro  | 55059 | 0 | 0 | 1 | \$10.10 |    |
| 50 | WI | Milwaukee    |                                 | Large central metro | 55079 | 0 | 0 | 1 | \$10.10 |    |
| 51 | WI | Outagamie    | (part of) Appleton              | Small metro         | 55087 | 0 | 0 | 1 | \$10.10 |    |
| 52 | WI | Winnebago    | (part of) Appleton <sup>k</sup> | Small metro         | 55139 | 0 | 0 | 1 | \$10.10 |    |

Sources: numerous, including compilations produced by U.C. Berkeley Labor Center, A Better Balance, and National Partnership for Women and Families; Ballotpedia website; media reports; state, county, and city websites.

<sup>a</sup> if blank, entire county covered by MW and/or PSL mandate.

<sup>b</sup> also Emeryville, Oakland, and San Leandro

<sup>c</sup> also Richmond

<sup>d</sup> also San Mateo

<sup>e</sup> also Los Altos, Milpitas, Mountain View, Palo Alto, San Jose, Santa Clara, and Sunnyvale

<sup>f</sup> also East Orange, Irvington, Montclair, and Newark

<sup>g</sup> also Patterson

<sup>h</sup> also Plainfield

<sup>i</sup> also SeaTac

<sup>j</sup> also part of Menasha

<sup>k</sup> also part of Menasha; Neenah
